# Supplementary material for: Single-keratinocyte transcriptomic analyses identify different clonal types and proliferative potential mediated by FOXM1 in human epidermal stem cells
Source: PubMed Central journal article supplement (PMC8097075; doi:10.1038/s41467-021-22779-9), 2021-05-04
Supplement: 41467_2021_22779_MOESM1_ESM.pdf [file 41467_2021_22779_MOESM1_ESM.pdf]

## Supplementary Information for:

### **SINGLE-KERATINOCYTE TRANSCRIPTOMIC ANALYSES IDENTIFIES DIFFERENT CLONAL TYPES AND PROLIFERATIVE POTENTIAL MEDIATED BY FOXM1 IN HUMAN EPIDERMAL STEM CELLS**

Elena Enzo<sup>1,10</sup>, Alessia Secone Seconetti<sup>1,2,10</sup>, Mattia Forcato<sup>3</sup>, Elena Tenedini<sup>4</sup>, Maria Pia Polito<sup>1</sup>, Irene Sala<sup>1</sup>, Sonia Carulli<sup>2</sup>, Roberta Contin<sup>1,9</sup>, Clelia Peano<sup>5,6</sup>, Enrico Tagliafico<sup>4,7,8</sup>, Silvio Biciato<sup>3</sup>, Sergio Bondanza<sup>2</sup> and Michele De Luca<sup>1,✉</sup>

<sup>1</sup>Centre for Regenerative Medicine “Stefano Ferrari”, University of Modena and Reggio Emilia, Modena, Italy

<sup>2</sup>Holostem Terapie Avanzate, s.r.l, Modena, Italy

<sup>3</sup>Department of Life Sciences, University of Modena and Reggio Emilia, Modena, Italy

<sup>4</sup>Department of Laboratory Medicine and Pathology, Diagnostic hematology and Clinical Genomics Unit, Modena University Hospital, Modena, Italy

<sup>5</sup>Genomic Unit, IRCSS, Humanitas Clinical and Research Center, Rozzano, Milan, Italy

<sup>6</sup>Institute of Genetic and Biomedical Research, UoS Milan, National Research Council, Rozzano, Italy.

<sup>7</sup>Department of Medical and Surgical Sciences, University of Modena and Reggio Emilia, Modena, Italy

<sup>8</sup>Centre for Genome Research, University of Modena and Reggio Emilia, Modena, Italy

<sup>9</sup>Present address: Clinical Sampling & Alliances, AstraZeneca, Cambridge, UK

<sup>10</sup>These authors contributed equally

✉Correspondence: michele.deluca@unimore.it

#### Table of content

- **Supplementary Data 1:** Genes comprising the Holoclone signature.
- **Supplementary Data 2:** Results of GSEA analysis for bulk and single cell expression data. For each comparison the table reports Normalized Enrichment Score (NES) and False Discovery Rate (FDR).
- **Supplementary Figure 1:** Gene ontology analysis of transcriptomic profile of human epidermal clones.
- **Supplementary Figure 2:** Single cell RNA-seq of human epidermal cells
- **Supplementary Figure 3:** Short term depletion of FOXM1 does not affect keratinocytes proliferation.
- **Supplementary Figure 4:** Analysis of FOXM1 isoforms in human primary keratinocytes.
- **Supplementary Figure 5:** Efficient silencing after siRNA addiction in CNT and FOXM1 overexpressing keratinocytes and immunofluorescence on JEB clones.
- **Supplementary Table 1:** List of antibodies used, source and concentration.
- **Supplementary Table 2:** List of siRNA used with code, type and catalogue number.
- **Supplementary Table 3:** List of taqman probes used for qRT-PCR and catalog number.
- **Supplementary Table 4:** List of primers used with specified name, sequence, reference and application.
- **Source data files** contains source data (.xls) and uncropped blots (.pdf).

# SUPPLEMENTARY FIGURE 1

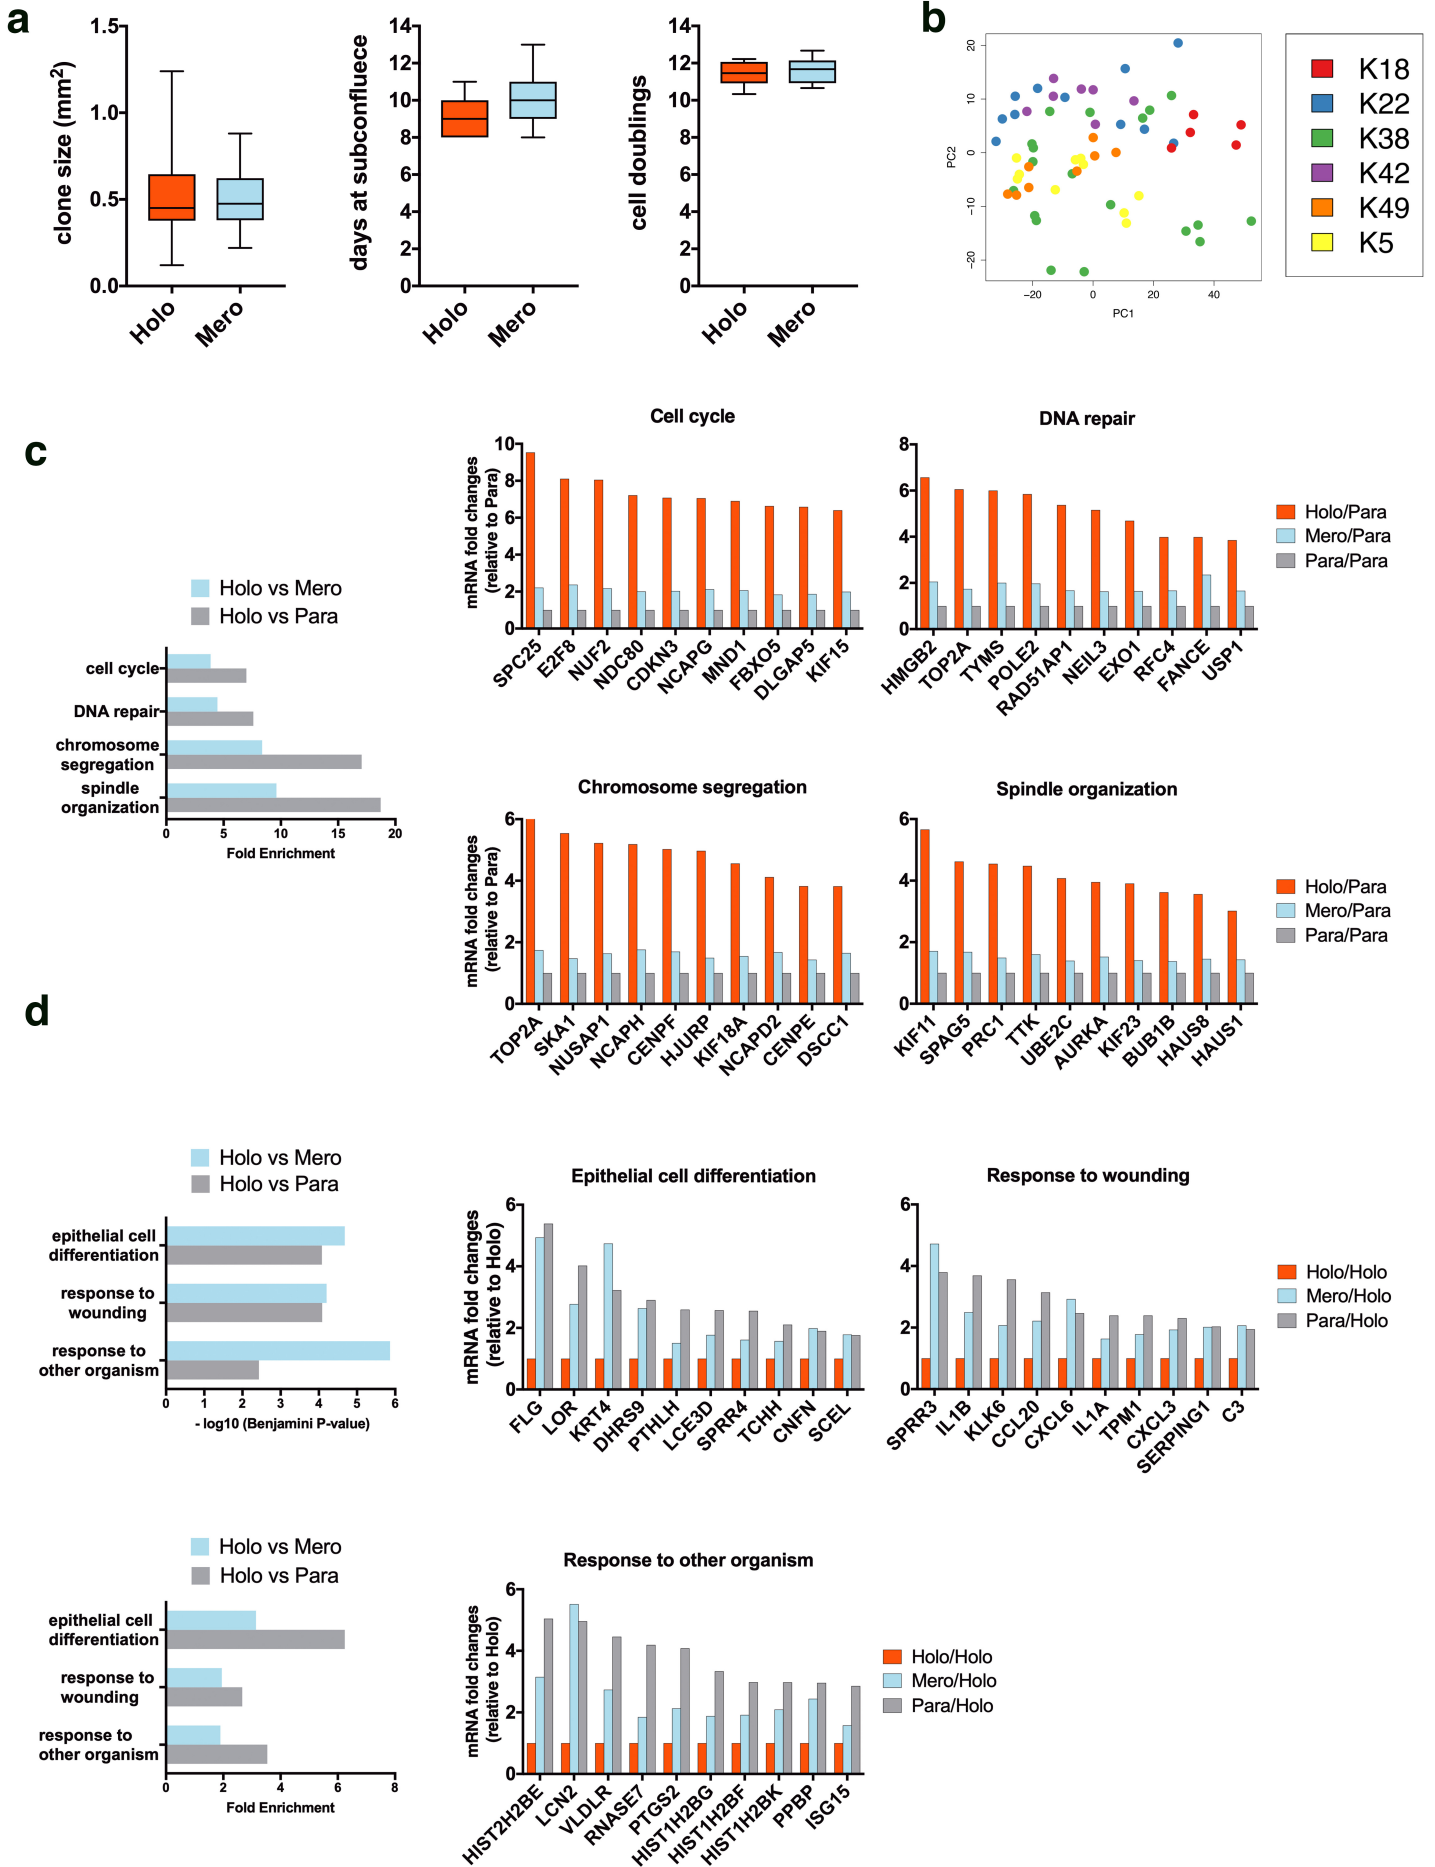

### **Supplementary Fig. 1: Gene ontology analysis of transcriptomic profile of human epidermal clones**

**a)** Floating bars showing respectively from left to right, size of the clones measured in mm<sup>2</sup> (12 holoclones and 12 meroclones analyzed), days required to reach sub-confluence of the sub-cultivated  $\frac{3}{4}$  of the clones (18 holoclones and 22 meroclones analyzed) and number of cell doublings made by each clone progeny during sub-cultivation (18 holoclones and 22 meroclones analyzed). Data derived from holoclones are identified with red and data derived from meroclones are indicated in light blue. Median and min to max values displayed.

**b)** Unsupervised principal component analysis (PCA) of holoclone gene expression profiles. Every dot represents a different clone (n=60), different colours represent the different strains.

**c)** left: Gene ontology (GO) analysis of the genes significantly upregulated (FDR $\leq$ 5% and fold change $\geq$ 1.5) in holoclones compared to meroclones (blue bars) and in holoclones compared to paraclones (grey bars). Histograms represent DAVID fold enrichments. Right: expression levels of selected genes of functional categories enriched in genes upregulated in holoclones. Fold changes are measured over paraclones.

**d)** Gene ontology (GO) analysis of the genes significantly downregulated (FDR $\leq$ 5% and fold change $\leq$ -1.5) in holoclones as compared to meroclones and paraclones. P-values are calculated with one-sided Fisher's Exact test and corrected for multiple tests with Benjamini-Hochberg method. Histograms represent  $-\log_{10}$  of the Benjamini score and DAVID fold enrichments. Right: expression levels of selected genes of functional categories enriched in genes downregulated in holoclones. Fold changes are measured over holoclones.

# SUPPLEMENTARY FIGURE 2

**a**

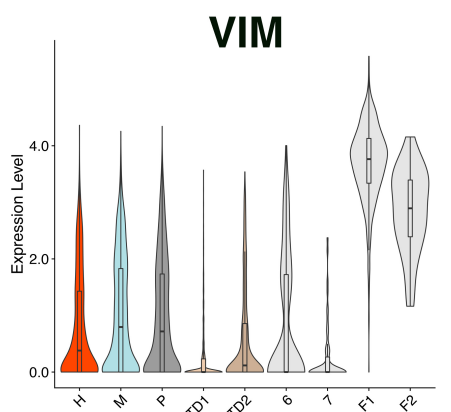

**b**

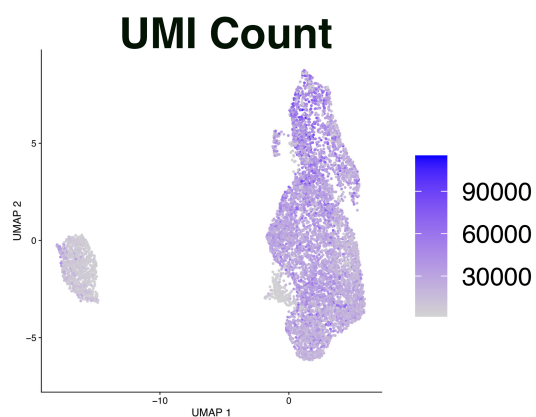

**c**

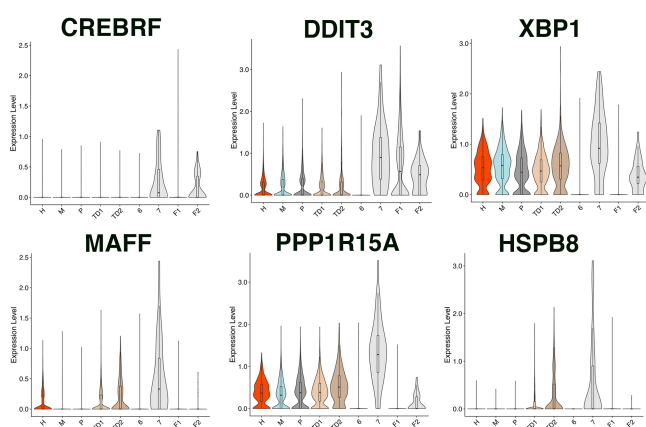

**d**

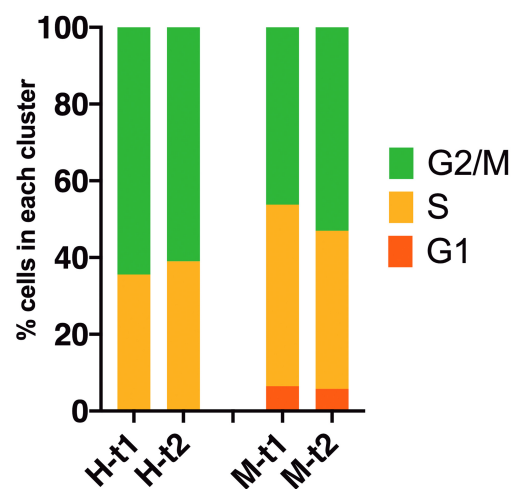

**e**

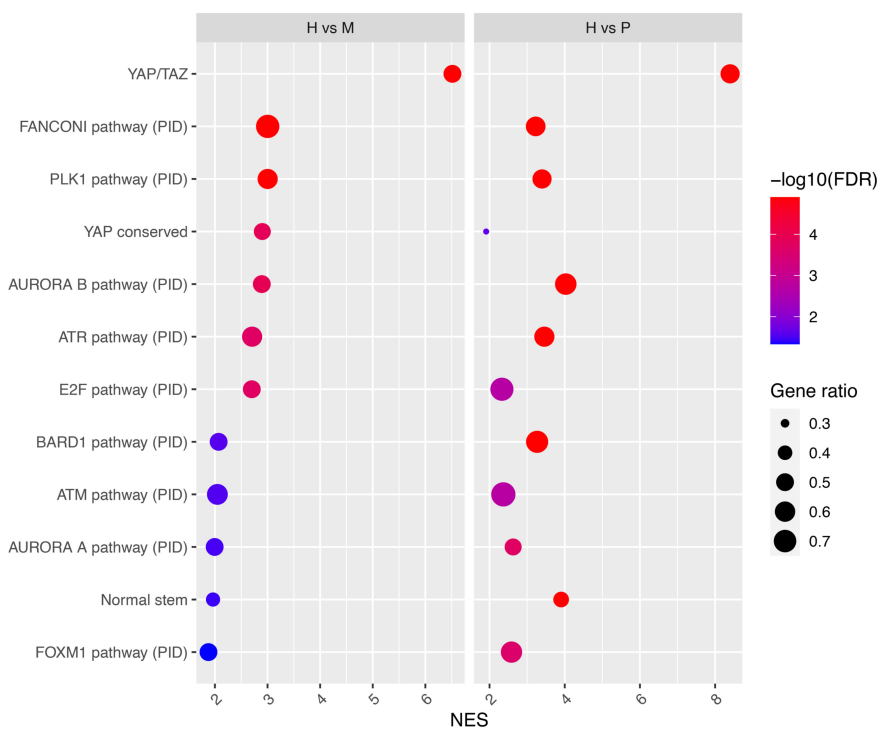

**f**

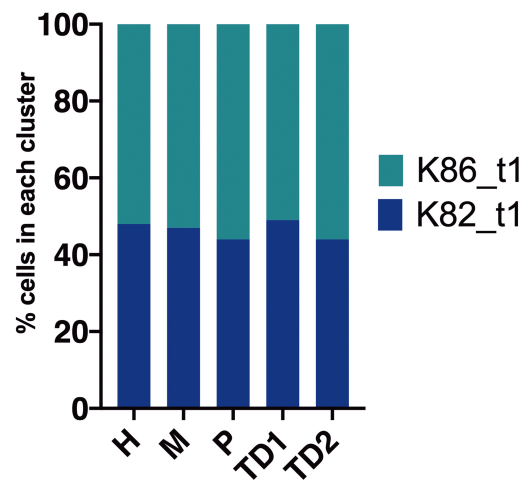

**Supplementary Fig. 2: Single cell RNA-seq of human epidermal cells**

- a)** Violin plot showing *VIM* expression in the 9 clusters identified in the integrated scRNA-seq dataset, n=7,345 cells. In boxplots, lines in the middle of boxes correspond to median values. Lower and upper hinges correspond to the first and third quartiles, the upper whisker extends from the hinge to the largest value no further than 1.5 \* IQR (inter-quartile range) from the hinge. The lower whisker extends from the hinge to the smallest value at most 1.5 \* IQR of the hinge.
- b)** UMAP plot showing the number of UMI counts identified in each cell.
- c)** Violin plot showing expression of stress related genes which are highly expressed in cluster 7. n=7,345 cells. In boxplots, lines in the middle of boxes correspond to median values. Lower and upper hinges correspond to the first and third quartiles, the upper whisker extends from the hinge to the largest value no further than 1.5 \* IQR (inter-quartile range) from the hinge. The lower whisker extends from the hinge to the smallest value at most 1.5 \* IQR of the hinge.
- d)** Percentage of cells in G2/M (green), S (yellow) or G1 (red) phases contained in H and M clusters at the indicated time point
- e)** Bubble plot showing results of gene set enrichment analysis (GSEA) on scRNA-seq data. The Normalized enrichment score (NES) is indicated on the x-axis; the dot size indicates the fraction of genes contributing to the leading-edge subset within the gene set. Dots are color-coded based on the enrichment FDR. In the image are shown the significant terms upregulated in holoclones both with respect to meroclones and with respect to paraclones.
- f)** Percentage of cells contained in each cluster deriving from K82 or K86 at t<sub>1</sub>.

# SUPPLEMENTARY FIGURE 3

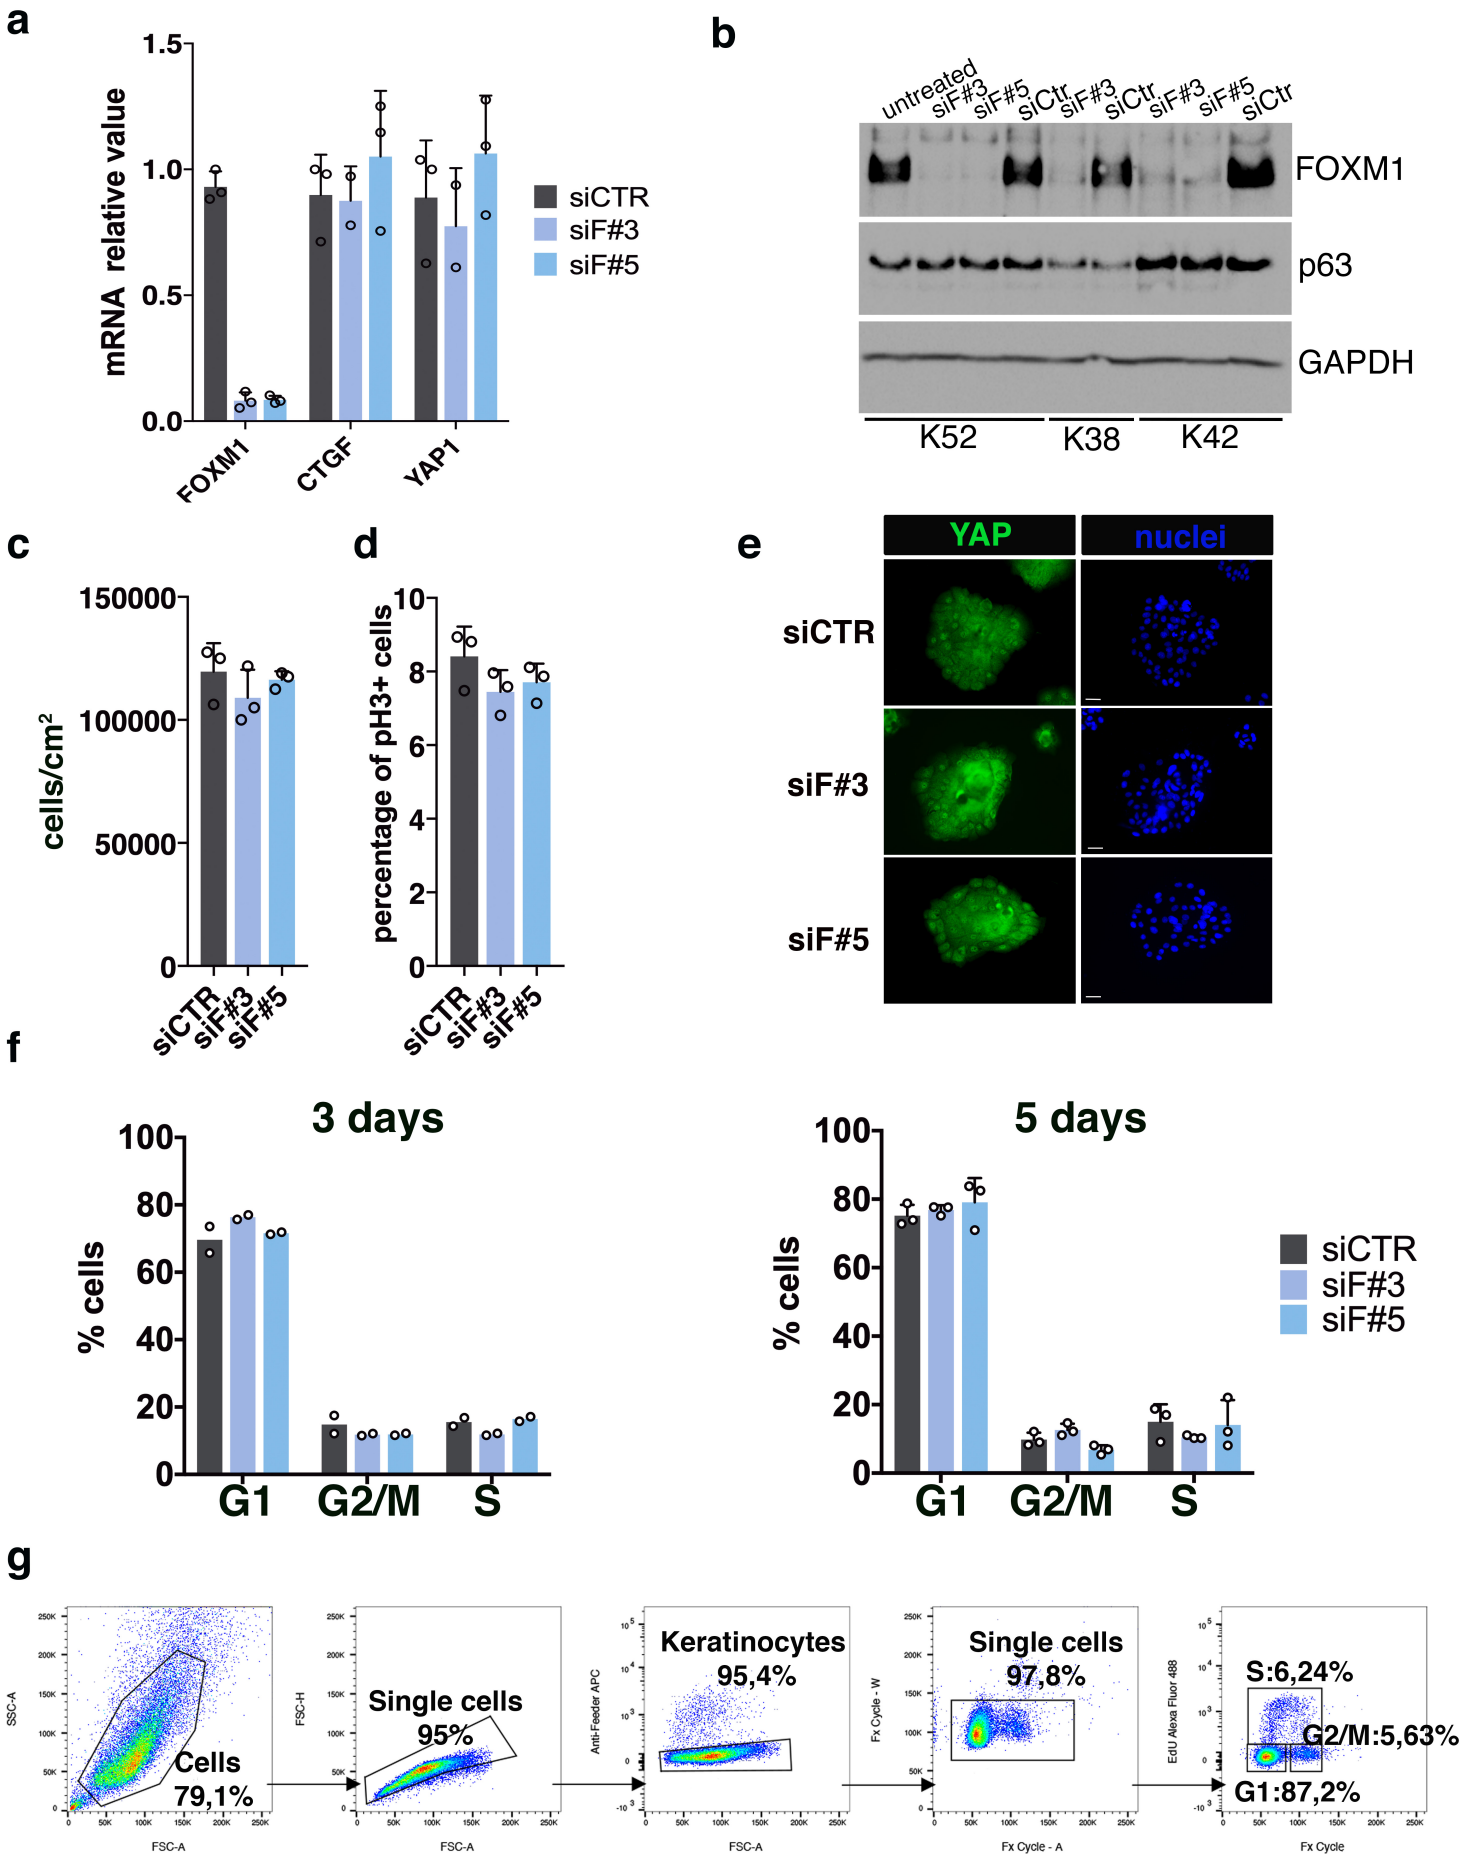

**Supplementary Fig. 3: Short term depletion of FOXM1 does not affect keratinocytes proliferation.**

- a) qRT-PCR on mRNAs obtained from keratinocytes transfected with different siRNA against FOXM1 was used to determine the expression of *FOXM1*, *CTGF* and *YAP*. Expression levels were calculated relative to *GAPDH* and are given relative to siCTR (arbitrarily set to 1). n = 3 independent human primary keratinocyte cultures, indicated with white circles; average and standard deviation displayed.
- b) Western analysis of total cell extracts from three independent cultures (K52, K38 and K42) generated by keratinocytes treated with the indicated siRNA stained with indicated antibodies.
- c) Amount of cell/cm<sup>2</sup> found after 7 days of cultivation with the indicated siRNA. n = 3 independent human primary keratinocyte cultures, indicated with white circles). Average and standard deviation displayed.
- d) Percentage of pH3<sup>+</sup> cells among the total amount of cells found after 7 days of cultivation with the indicated siRNA. n = 3 independent human primary keratinocyte cultures, indicated with white circles; Average and standard deviation displayed.
- e) Representative image of colonies treated with the indicated siRNA and stained with anti-YAP antibody (green). Nuclei are visualized in blue with DAPI. Scale bar 20 μm.
- f) Percentage of cells in G1, G2/M or S phases found after 3 (left) or 5 days (right) of cultivation with the indicated siRNA. 2 (for 3 days) and 3 (for 5 days) biological replicates are indicated by white circles. Average and standard deviation (only for 5 days) displayed.
- g) Gating strategy to determine the percentage of cells in each cell cycle phase. The starting cell population was gated based on FSC-A versus SSC-A. Doublets were excluded using FSC-A versus FSC-H and forward scatter versus anti-feeder APC was used to distinguish keratinocytes from 3t3 fibroblasts. Doublets were excluded using FxCycle-A versus FxCycle-W. Fx-cycle VioBlue and EdU Alexa Fluor 488-A were assessed on the keratinocytes population to identify cells in G0/G1 phase, in S phase and in G2/M phase.

# SUPPLEMENTARY FIGURE 4

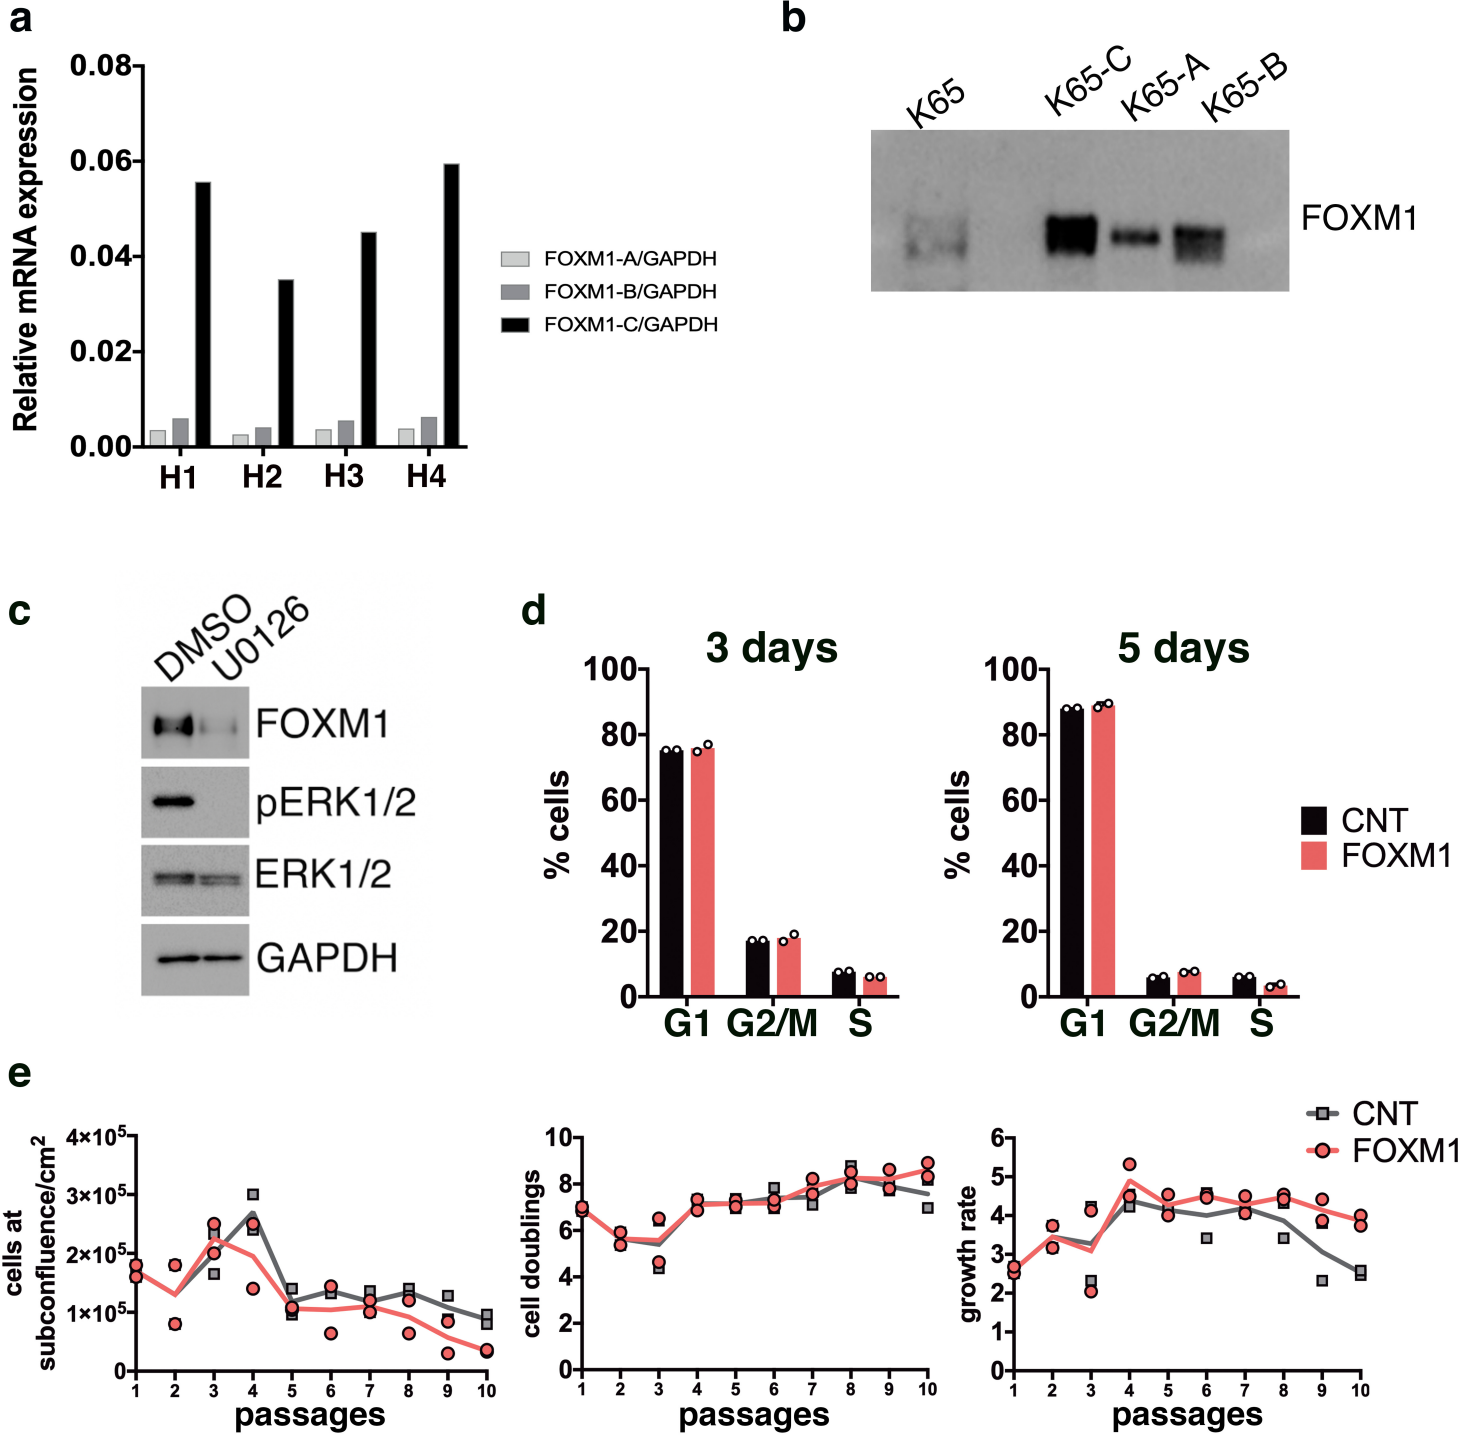



**Supplementary Fig. 4: Analysis of FOXM1 isoforms in human primary keratinocytes.**

**a)** qRT-PCR on mRNAs obtained from 4 holoclone-derived mass cultures using primer specific for isoform A, B or C (see Methods). Bars represent expression levels of each holoclone calculated relative to GAPDH.

**b)** Western analysis of total cell extracts from cultures generated by normal keratinocytes (K65) and keratinocytes overexpressing FOXM1 respectively isoform A, B and C showing that bands present in normal keratinocytes have the same pattern of FOXM1-C (representative images of n = 3).

**c)** Western analysis of total cell extracts from cultures treated with vehicle (DMSO) or 30 $\mu$ M of U0126 drug showing that endogenous FOXM1 expression decreases when ERK1/2 is not phosphorylated (representative images of n = 3).

**d)** Percentage of cells in G1, G2/M or S phases found after 3 (left) or 5 days (right) of cultivation of control (CNT) and FOXM1 overexpressing keratinocytes. Bars indicated average value, 2 biological replicates are indicated by white circles.

**e)** Serial cultivation of control (CNT, gray line) and FOXM1-transduced (red line) epidermal cultures. From left to right: number of cells found after trypsinization when cultures arrive at subconfluence; number of cell doublings at each passage and growth rate, calculated as population doublings per passage. Data derived from serial cultivation of two independent strains of human primary keratinocytes. Average values are plotted with line and biological replicates (K38 and K57) are indicated with circles.

SUPPLEMENTARY FIGURE 5

a

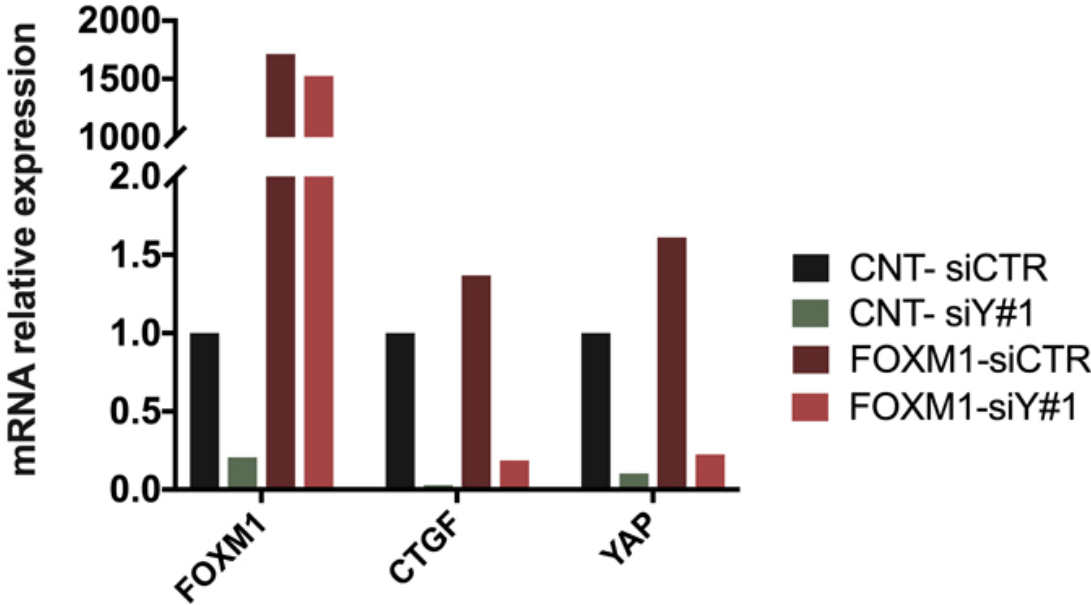

b

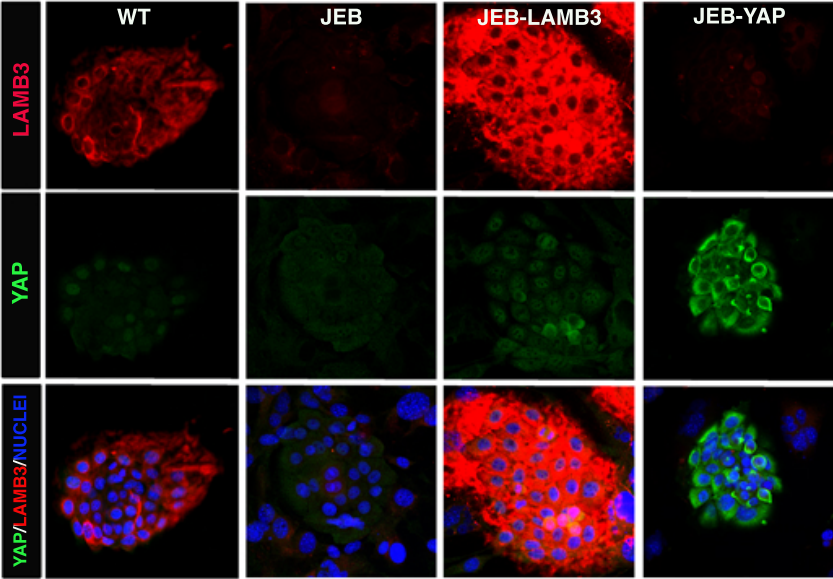

**Supplementary Fig. 5: Efficient silencing after siRNA addition in CNT and FOXM1 overexpressing keratinocytes and immunofluorescence on JEB clones.**

**a)** Related to Figure 5a: qRT-PCR on mRNAs obtained from CNT or FOXM1-transduced keratinocytes transfected with the indicated siRNA was used to determine the expression of *FOXM1*, *CTGF* and *YAP*. Expression levels were calculated relative to *GAPDH* and are given relative to CNT siCTR (arbitrarily set to 1). Bars show value from one representative experiment of 3 biological replicates.

**b)** Related to Figure 6e: immunofluorescence showing YAP (green) and LAMB3 (red) expression in JEB, LAMB3- and YAP-transduced JEB. DAPI (blue) stains nuclei. Scale bar 20  $\mu\text{m}$  (representative images of  $n = 3$ ).

**Supplementary Table 1: List of antibodies used, source and concentration**

| Antibody information                        |                                     |                |                    | Dilution/amount |       |                 |       |
|---------------------------------------------|-------------------------------------|----------------|--------------------|-----------------|-------|-----------------|-------|
| Antibody                                    | Company                             | Catalog Number | Description        | Western Blot    | ChIP  | IF              | FACS  |
| anti-FOXM1                                  | Cell signaling Technology           | D3F2B          | Rabbit monoclonal  | 1/1000          |       | 1/500           |       |
| anti-p63 alfa                               | Di Iorio et al., 2005               | N/A            | Rabbit monoclonal  | 1/2000          |       |                 |       |
| anti-BIRC5                                  | Abcam                               | ab469          | Rabbit polyclonal  | 1/2000          |       |                 |       |
| anti-GAPDH                                  | Abcam                               | ab8245         | Mouse monoclonal   | 1/10000         |       |                 |       |
| anti-ITGB1                                  | Abcam                               | ab52971        | Rabbit monoclonal  | 1/1000          |       |                 |       |
| anti-ITGB4                                  | Santa Cruz Biotechnology            | sc-135950      | Mouse monoclonal   | 1/200           |       |                 |       |
| anti-SFN (14-3-3 s)                         | Abcam                               | ab14123        | Mouse monoclonal   | 1/200           |       |                 |       |
| anti-YAP1                                   | Millipore                           | MAB-C203       | Mouse monoclonal   | 1/500           |       |                 |       |
| anti-LAMB3                                  | Santa Cruz Biotechnology            | sc-7651        | Goat polyclonal    | 1/700           |       |                 |       |
| anti-FOXM1 (A-11)                           | Santa Cruz Biotechnology            | Sc-271746      | Mouse monoclonal   |                 |       | 1/500           |       |
| anti-Laminin $\beta$ -3 (6F12)              | Patricia Rousselle Laboratory, Lyon | N/A            | Mouse monoclonal   |                 |       | 1/150000        |       |
| anti-YAP                                    | Santa Cruz Biotechnology            | sc-101199      | Mouse monoclonal   |                 |       | 1/500           |       |
| anti-MAPK                                   | Cell Signaling Technology           | 91025          | Rabbit polyclonal  | 1/1000          |       |                 |       |
| anti-phospho MAPK                           | Cell Signaling Technology           | 4370L          | Rabbit polyclonal  | 1/1000          |       |                 |       |
| anti-KRT14                                  | Biolegend                           | 905301         | Rabbit polyclonal  |                 |       | 1/8000          |       |
| anti-phospho-Histone H3 (ser10)             | Millipore                           | 06-570         | Rabbit polyclonal  |                 |       | 1/500           |       |
| anti-IgG                                    | Abcam                               | ab171870       | Rabbit polyclonal  |                 | 1/300 |                 |       |
| anti-YAP                                    | Cell signaling Technology           | D8H1X          | Rabbit monoclonal  |                 | 1/25  | 1/500           |       |
| anti-TEAD4                                  | Abcam                               | ab58310        | Mouse monoclonal   |                 | 1/300 |                 |       |
| Anti-Feeder APC                             | Milteny biotech                     | 130-102-900    | Mouse monoclonal   |                 |       |                 | 1/50  |
| Alexa Fluor 488 Azide                       | Thermo Fisher                       | C10425B        | Mouse monoclonal   |                 |       |                 | 1/200 |
| Donkey anti-rabbit IgG HRP                  | Santa Cruz Biotechnology            | sc-2313        | secondary antibody | 1/1000 - 1/5000 |       |                 |       |
| Donkey anti-mouse IgG HRP                   | Santa Cruz Biotechnology            | sc-2314        | secondary antibody | 1/10000         |       |                 |       |
| Donkey anti-Mouse IgG (H+L) Alexa Fuor 568  | Thermo Fisher Scientific            | A10037         | secondary antibody |                 |       | 1/2000 - 1/1000 |       |
| Donkey anti-Rabbit IgG (H+L) Alexa Fuor 488 | Thermo Fisher Scientific            | A21206         | secondary antibody |                 |       | 1/2000 - 1/1000 |       |

**Supplementary Table 2: List of siRNA used with code, type and catalogue number**

| siRNA name | gene             | code                    | type                            | catalog number |
|------------|------------------|-------------------------|---------------------------------|----------------|
| siC        | negative control | _                       | silencer select (Thermo fisher) | 4390843        |
| siF#3      | FOXM1            | s5250                   | silencer select (Thermo fisher) | 4392420        |
| siF#5      | FOXM1            | s5248                   | silencer select (Thermo fisher) | 4392420        |
| siY#1      | YAP1             | <a href="#">s536627</a> | silencer select (Thermo fisher) | 4392420        |
| siY#2      | YAP1             | <a href="#">s536628</a> | silencer select (Thermo fisher) | 4392420        |

**Supplementary Table 3: List of taqman probes used for qRT-PCR and catalog number**

| Taqman probes | Catalog Number |
|---------------|----------------|
| ANLN          | Hs01122612_m1  |
| AURKB         | Hs00945855_g1  |
| CCNA2         | Hs00996788_m1  |
| CCNB1         | Hs01030099_m1  |
| CKAP2L        | Hs00403991_m1  |
| CTGF          | Hs01026927_g1  |
| FOXM1         | Hs01073586_m1  |
| GAPDH         | 4332649        |
| HMGB2         | Hs01127828_g1  |
| LMNB1         | Hs01059210_m1  |
| WDR76         | Hs00227706_m1  |
| YAP1          | Hs00902712_g1  |

**Supplementary Table 4: List of primers used with specified name, sequence, reference and application**

| Primer name       | sequence                     | Reference                            | Application |
|-------------------|------------------------------|--------------------------------------|-------------|
| FoxM1sito-69-FOR  | ACCGCACAGCCTTCGAG            | adapted from Eisenger-Mathason, 2015 | ChIP        |
| FoxM1sito-69-REV  | GTTTGAAATTGGCGCCGG           | adapted from Eisenger-Mathason, 2015 | ChIP        |
| FoxM1sito-652-FOR | GGAAAGAACCTTGTCTGCCA         | from Mizuno et al ,2012              | ChIP        |
| FoxM1sito-652-REV | AGCCAAGCCTTCGGATATAA         | from Mizuno et al ,2012              | ChIP        |
| HBB-FOR           | GCTTCTGACACA ACTGTGTTCACTAGC | Zanconato et al ,2015                | ChIP        |
| HBB-REF           | CACCAACTTCATCCACGTTCAACC     | Zanconato et al ,2016                | ChIP        |
| CTGF- FOR         | TGTGCCAGCTTTTTAGACG          | Zanconato et al ,2017                | ChIP        |
| CTGF- REV         | TGAGCTGAATGGAGTCCTACACA      | Zanconato et al ,2018                | ChIP        |
| Foxm1-A FOR       | TGGGGAACAGGTGGTGGTTTGG       | custom made                          | qRT-PCR     |
| Foxm1-A REV       | GCTAGCAGCACTGATAAACAAAG      | custom made                          | qRT-PCR     |
| Foxm1-B FOR       | CAGGTGTTTAAGCAGCAGA          | custom made                          | qRT-PCR     |
| Foxm1-C FOR       | CAATTGCCCGAGCACTTGGGAATCA    | custom made                          | qRT-PCR     |
| Foxm1-BC REV      | TCCTCAGCTAGCAGCACCTTG        | custom made                          | qRT-PCR     |
