# Supplementary material for: Single-keratinocyte transcriptomic analyses identify different clonal types and proliferative potential mediated by FOXM1 in human epidermal stem cells
Source: PubMed Central journal article supplement (PMC8097075; doi:10.1038/s41467-021-22779-9), 2021-05-04
Supplement: 41467_2021_22779_MOESM5_ESM.pdf [file 41467_2021_22779_MOESM5_ESM.pdf]

**Title:** Supplementary Data 1:

**Description:** *Genes comprising the Holoclone signature*

**Title:** Supplementary Data 2:

**Description:** *Results of GSEA analysis for bulk and single cell expression data. For each comparison the table reports Normalized Enrichment Score (NES) and False Discovery Rate (FDR).*
